# Supplementary material for: Smoker and non-smoker lung adenocarcinoma is characterized by distinct tumor immune microenvironments
Source: PubMed Central journal article supplement — Oncoimmunology. 2018 Jul 30;7(10):e1494677. doi: 10.1080/2162402X.2018.1494677 (PMC6169585; doi:10.1080/2162402x.2018.1494677), 2018-07-30
Supplement: koni-07-10-1494677-s001.pdf [file koni-07-10-1494677-s001.pdf]

**Smoker and non-smoker lung adenocarcinoma is characterized by  
distinct tumor immune microenvironments**

By Li *et al.*

**Supplemental material**

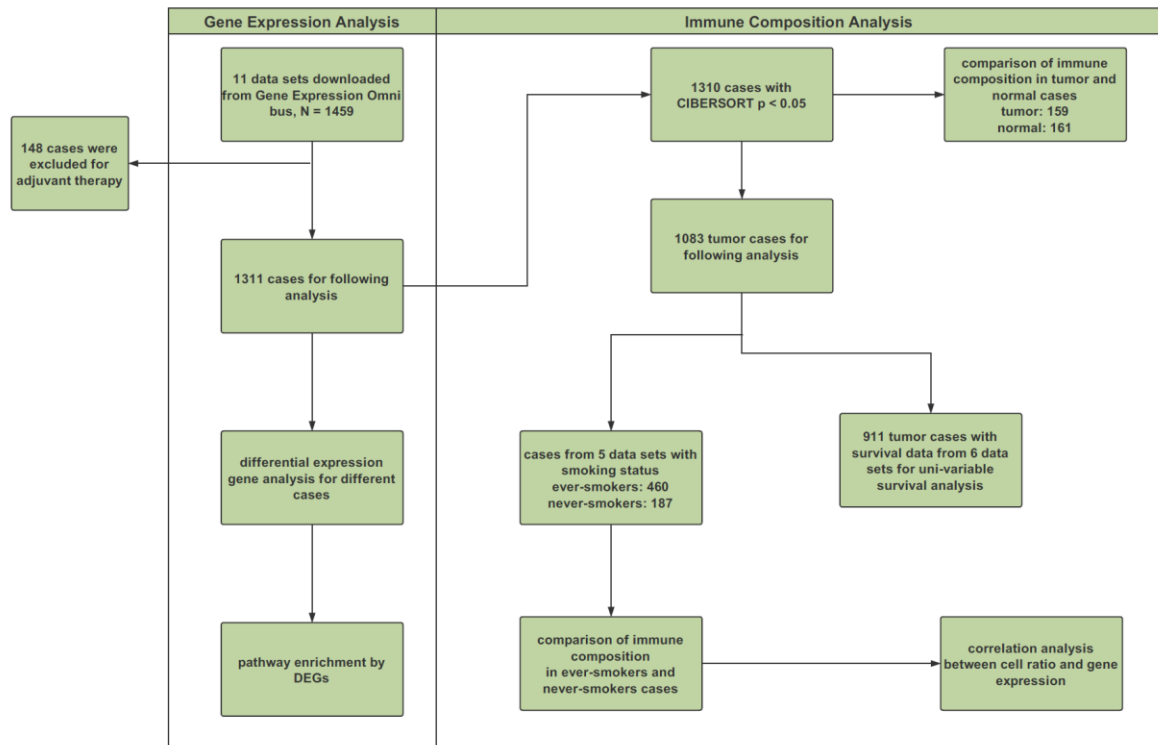

**Figure S1. A flowchart for data analyses in the study.**

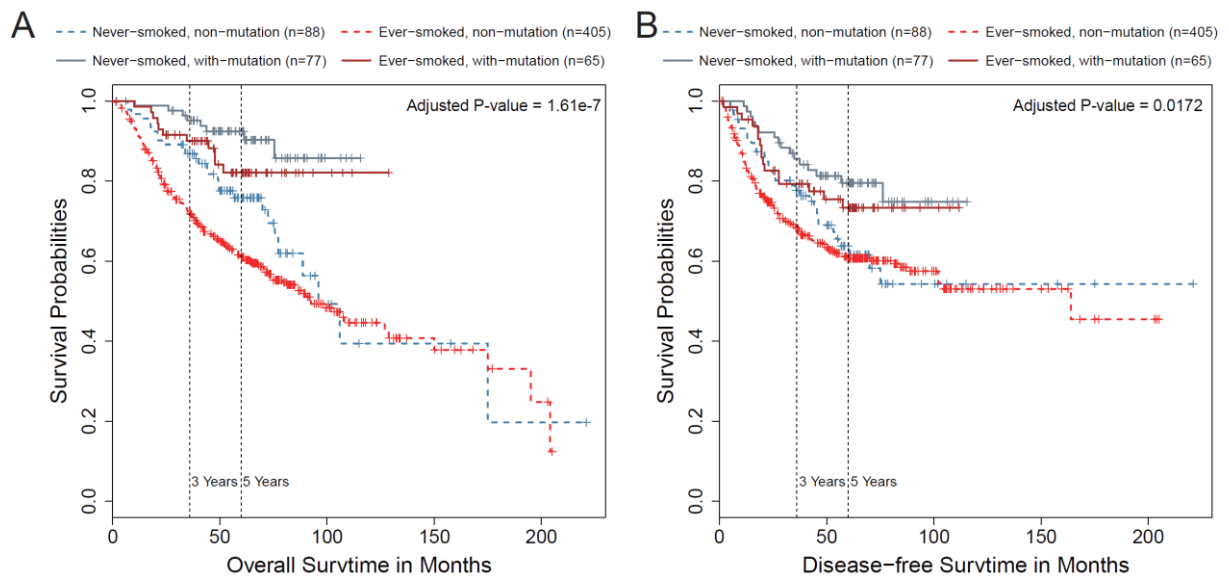

**Figure S2. Kaplan-Meier plots for different smoking status and mutation status adjusted by gender and stage.** Patients without any of EGFR mutation, K-ras mutation, and ALK fusion were defined as without mutation. In the same mutation status (with or without mutations), the prognostics of never-smokers were better than ever-smokers both in overall survival (**A**) and recurrence-free survival (**B**).

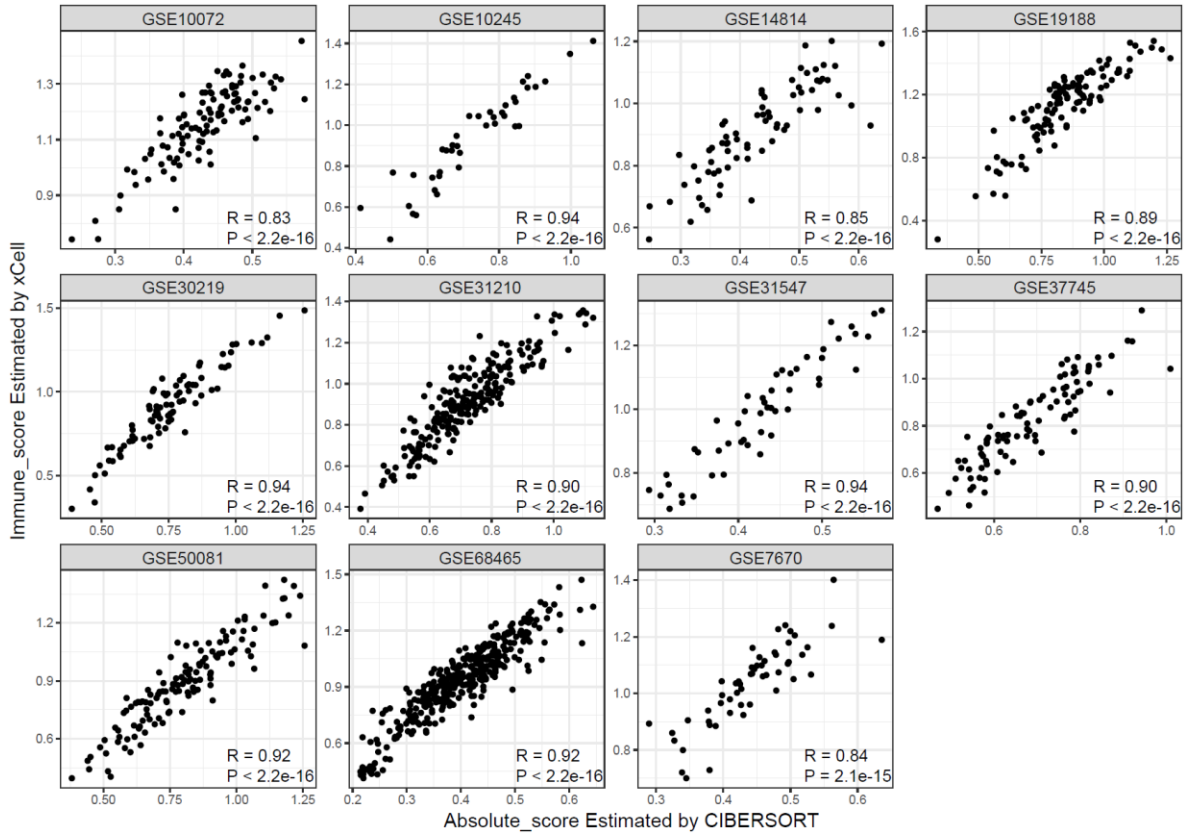

**Figure S3. High correlations in immune infiltration scores estimated by CIBERSORT and xCell.**

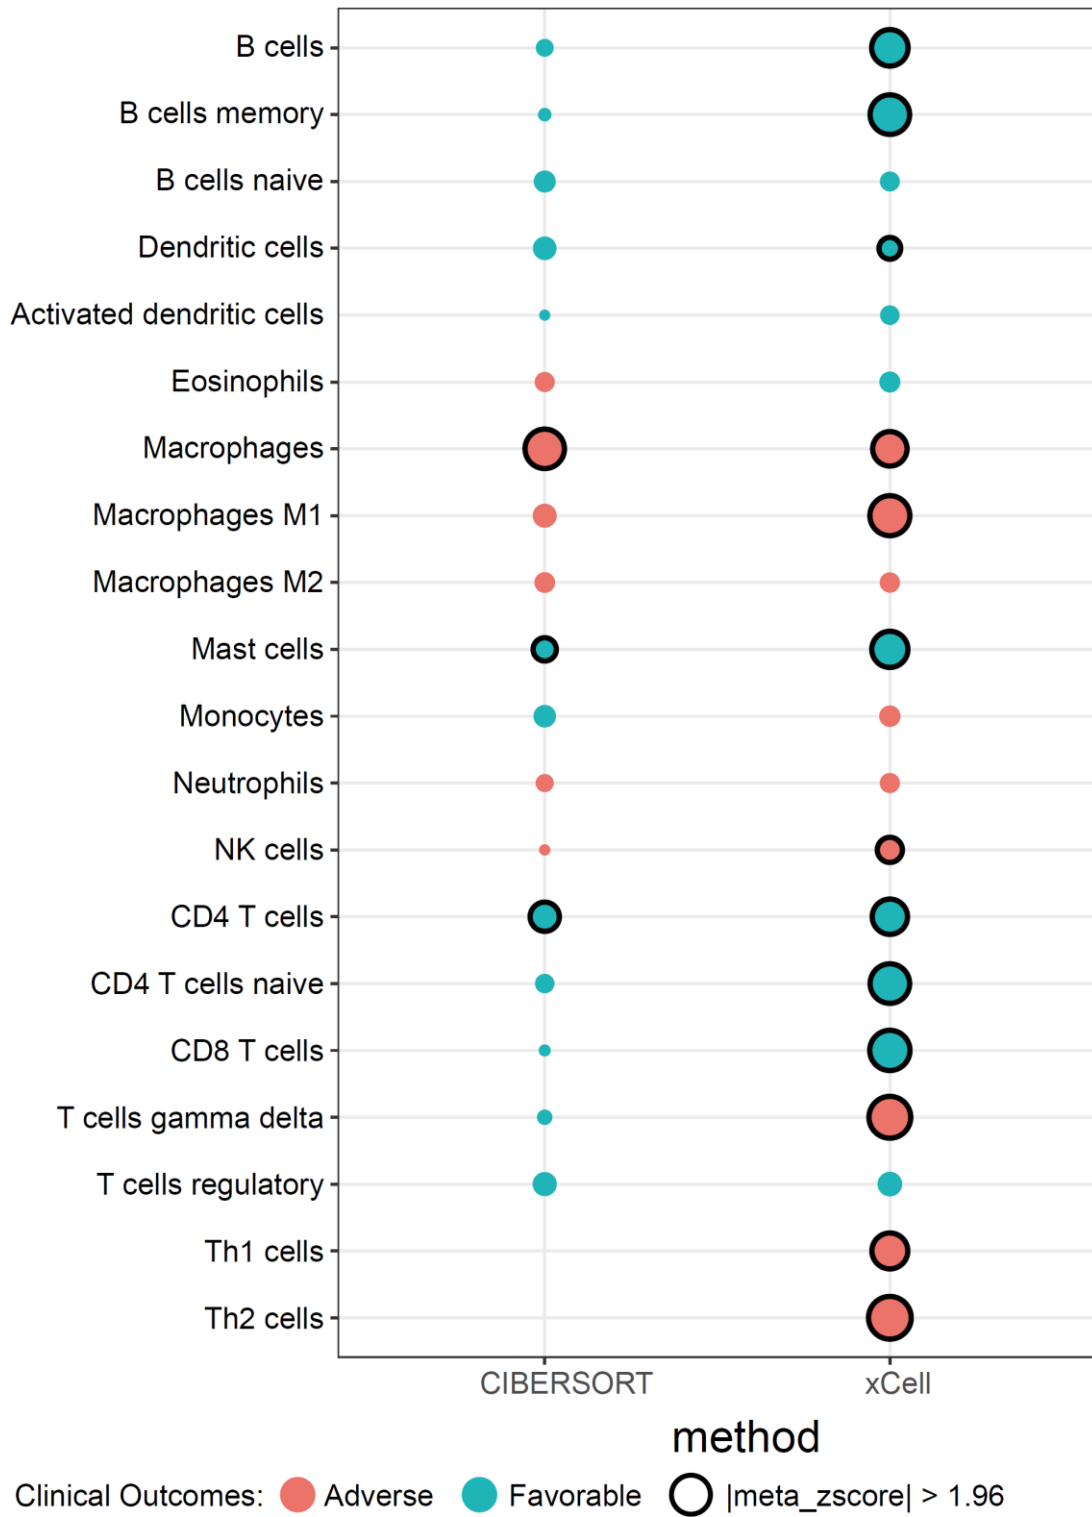

**Figure S4. Comparisons of survival outcomes in overlapped immune subtypes between CIBERSORT and xCell.**
